# Supplementary material for: The Multi-Sites Trial on the Effects of Therapeutic Gardening on Mental Health and Well-Being
Source: MDPI journal article supplement (doi:10.3390/ijerph19138046), 2022-06-30
Supplement: s1 [file s1]

**Table S1.** The example of therapeutic gardening program.

| <b>Session</b> | <b>Activity</b>              | <b>Session</b> | <b>Activity</b>                      |
|----------------|------------------------------|----------------|--------------------------------------|
| 1              | Introduction                 | 16             | Harvesting vegetables                |
| 2              | Preparing gardening          | 17             | Setting up autumn garden             |
| 3              | Setting up kitchen garden    | 18             | Making terrarium                     |
| 4              | Setting up seasonal bed      | 19             | Walking in a garden                  |
| 5              | Setting up herb bed          | 20             | Propagating plants with suckering    |
| 6              | Health lecture               | 21             | Propagating plants with stem cutting |
| 7              | Setting up aquatic garden    | 22             | Setting up grass garden              |
| 8              | Setting up rock garden       | 23             | Plant Pruning                        |
| 9              | Sowing, mulching, composting | 24             | Making autumn wreath                 |
| 10             | Making herbal soap           | 25             | Walking in a garden                  |
| 11             | Walking in a garden          | 26             | Collecting seed                      |
| 12             | Irrigation, removing weed    | 27             | Making bird house                    |
| 13             | Pest control                 | 28             | Making own mini garden               |
| 14             | Setting up butterfly garden  | 29             | Planting fall bulbs                  |
| 15             | Setting up hanging garden    | 30             | Garden party, exhibition             |

**Table S2.** The result of moderation analysis of gender.

|                         | Effects<br>Estimate | SE    | df  | t      | <i>p</i> |
|-------------------------|---------------------|-------|-----|--------|----------|
| <b>MHS:D</b>            |                     |       |     |        |          |
| Intercept               | 12.067              | 0.885 | 637 | 13.630 | < 0.0001 |
| Time                    | -1.144              | 0.151 | 637 | -7.568 | < 0.0001 |
| Gender                  | 2.332               | 1.961 | 109 | 1.190  | 0.237    |
| Time*Gender             | 0.686               | 0.338 | 637 | 2.031  | 0.043*   |
| <b>MHS:A</b>            |                     |       |     |        |          |
| Intercept               | 11.233              | 0.904 | 638 | 12.427 | < 0.0001 |
| Time                    | -0.855              | 0.134 | 638 | -6.396 | < 0.0001 |
| Gender                  | 2.537               | 2.001 | 109 | 1.268  | 0.208    |
| Time*Gender             | 0.370               | 0.300 | 638 | 1.232  | 0.218    |
| <b>EDAS</b>             |                     |       |     |        |          |
| Intercept               | 16.908              | 0.363 | 637 | 46.573 | < 0.0001 |
| Time                    | 0.239               | 0.065 | 637 | 3.697  | 0.0002   |
| Gender                  | -0.166              | 0.806 | 109 | -0.206 | 0.837    |
| Time*Gender             | 0.065               | 0.145 | 637 | 0.449  | 0.653    |
| <b>WHOQOL<br/>-BREF</b> |                     |       |     |        |          |
| Intercept               | 81.948              | 1.539 | 96  | 53.250 | < 0.0001 |
| Time                    | 9.800               | 1.841 | 90  | 5.322  | < 0.0001 |
| Gender                  | -0.859              | 4.198 | 96  | -0.205 | 0.838    |
| Time*Gender             | 7.949               | 5.284 | 90  | 1.504  | 0.136    |
| <b>MAAS</b>             |                     |       |     |        |          |
| Intercept               | 60.272              | 1.419 | 102 | 42.464 | < 0.0001 |
| Time                    | 6.401               | 1.795 | 97  | 3.566  | 0.0006   |
| Gender                  | -5.512              | 3.264 | 102 | -1.689 | 0.094    |
| Time*Gender             | 1.318               | 4.178 | 97  | 0.315  | 0.753    |

Note: SE = Standard Error. df = degree of freedom. t = t-value. \* *p*-value < 0.05. MHS:D—Mental Health Screening Tool for Depressive disorders; MHS:A—Mental Health Screening Tool for Anxiety disorders; EDAS—Engagement in Daily Activity Scale; WHOQOL-BREF—Brief version of WHO Quality of Life; MAAS—Mindful Attention Awareness Scale.

**Table S3.** The result of moderation analysis of age.

|                         | Effects<br>Estimate | SE    | df  | t      | <i>p</i> |
|-------------------------|---------------------|-------|-----|--------|----------|
| <b>MHS:D</b>            |                     |       |     |        |          |
| Intercept               | 10.607              | 1.267 | 637 | 8.374  | < 0.0001 |
| Time                    | -1.495              | 0.216 | 637 | -6.917 | < 0.0001 |
| Age                     | 3.151               | 1.613 | 109 | 1.953  | 0.053    |
| Time*Age                | 0.787               | 0.274 | 637 | 2.870  | 0.0042*  |
| <b>MHS:A</b>            |                     |       |     |        |          |
| Intercept               | 8.481               | 1.255 | 638 | 6.759  | < 0.0001 |
| Time                    | -0.782              | 0.197 | 638 | -3.960 | 0.0001   |
| Age                     | 5.289               | 1.597 | 109 | 3.312  | 0.001    |
| Time*Age                | 0.007               | 0.250 | 638 | 0.029  | 0.977    |
| <b>EDAS</b>             |                     |       |     |        |          |
| Intercept               | 17.925              | 0.506 | 637 | 35.399 | < 0.0001 |
| Time                    | 0.326               | 0.094 | 637 | 3.472  | 0.0006   |
| Age                     | -1.709              | 0.644 | 109 | -2.625 | 0.009    |
| Time*Age                | -0.123              | 0.119 | 637 | -1.029 | 0.304    |
| <b>WHOQOL<br/>-BREF</b> |                     |       |     |        |          |
| Intercept               | 84.031              | 2.226 | 96  | 37.746 | < 0.0001 |
| Time                    | 10.213              | 2.711 | 90  | 3.767  | 0.0003   |
| Age                     | -3.852              | 2.898 | 96  | -1.329 | 0.187    |
| Time*Age                | 0.974               | 3.538 | 90  | 0.275  | 0.784    |
| <b>MAAS</b>             |                     |       |     |        |          |
| Intercept               | 61.425              | 2.160 | 102 | 28.442 | < 0.0001 |
| Time                    | 7.391               | 2.721 | 97  | 2.717  | 0.008    |
| Age                     | -3.415              | 2.689 | 102 | -1.270 | 0.207    |
| Time*Age                | -1.101              | 3.385 | 97  | -0.325 | 0.746    |

Note: SE = Standard Error. df = degree of freedom. t = t-value. \* *p*-value < 0.05. MHS:D—Mental Health Screening Tool for Depressive disorders; MHS:A—Mental Health Screening Tool for Anxiety disorders; EDAS—Engagement in Daily Activity Scale; WHOQOL-BREF—Brief version of WHO Quality of Life; MAAS—Mindful Attention Awareness Scale.

**Table S4.** The result of moderation analysis of presence of mental disorder.

|                         | Effects<br>Estimate | SE    | df  | t      | <i>p</i> |
|-------------------------|---------------------|-------|-----|--------|----------|
| <b>MHS:D</b>            |                     |       |     |        |          |
| Intercept               | 8.523               | 1.027 | 637 | 8.297  | < 0.0001 |
| Time                    | -1.265              | 0.196 | 637 | -6.445 | < 0.0001 |
| MD                      | 7.626               | 1.415 | 109 | 5.391  | < 0.0001 |
| Time*MD                 | 0.502               | 0.273 | 637 | 1.841  | 0.0661*  |
| <b>MHS:A</b>            |                     |       |     |        |          |
| Intercept               | 8.555               | 1.106 | 638 | 7.737  | < 0.0001 |
| Time                    | -0.978              | 0.172 | 638 | -5.696 | < 0.0001 |
| MD                      | 6.055               | 1.522 | 109 | 3.978  | 0.0001   |
| Time*MD                 | 0.383               | 0.240 | 638 | 1.599  | 0.110    |
| <b>EDAS</b>             |                     |       |     |        |          |
| Intercept               | 16.342              | 0.466 | 637 | 35.041 | < 0.0001 |
| Time                    | 0.324               | 0.083 | 637 | 3.920  | 0.0001   |
| MD                      | 1.002               | 0.642 | 109 | 1.559  | 0.122    |
| Time*MD                 | -1.139              | 0.115 | 637 | -1.205 | 0.229    |
| <b>WHOQOL<br/>-BREF</b> |                     |       |     |        |          |
| Intercept               | 83.306              | 1.942 | 96  | 42.897 | < 0.0001 |
| Time                    | 15.882              | 2.205 | 90  | 7.202  | < 0.0001 |
| MD                      | -3.582              | 2.857 | 96  | -1.254 | 0.213    |
| Time*MD                 | -11.390             | 3.295 | 90  | -3.456 | 0.0008*  |
| <b>MAAS</b>             |                     |       |     |        |          |
| Intercept               | 62.586              | 1.848 | 102 | 33.869 | < 0.0001 |
| Time                    | 8.922               | 2.334 | 97  | 3.822  | 0.0002   |
| MD                      | -6.324              | 2.527 | 102 | -2.502 | 0.014    |
| Time*MD                 | -4.326              | 3.209 | 97  | -1.348 | 0.181    |

Note: SE = Standard Error. df = degree of freedom. t = t-value. \* *p*-value < 0.05. MHS:D—Mental Health Screening Tool for Depressive disorders; MHS:A—Mental Health Screening Tool for Anxiety disorders; EDAS—Engagement in Daily Activity Scale; WHOQOL-BREF—Brief version of WHO Quality of Life; MAAS—Mindful Attention Awareness Scale.

**Table S5.** The result of multilevel analysis of each mental disorder for ‘Mental Health Screening Tool for Depressive disorders’.

|                                    | Effects<br>Estimate | SE    | df | t      | <i>p</i>  |
|------------------------------------|---------------------|-------|----|--------|-----------|
| <b>Depressive Disorder</b>         |                     |       |    |        |           |
| Intercept                          | 16.474              | 2.482 | 86 | 6.639  | < 0.0001  |
| Time                               | -1.084              | 0.486 | 86 | -2.232 | 0.0282*   |
| <b>Schizophrenia</b>               |                     |       |    |        |           |
| Intercept                          | 16.682              | 2.679 | 77 | 6.227  | < 0.0001  |
| Time                               | -0.120              | 0.593 | 77 | -0.202 | 0.8406    |
| <b>Neurocognitive Disorder</b>     |                     |       |    |        |           |
| Intercept                          | 13.051              | 1.263 | 49 | 10.333 | < 0.0001  |
| Time                               | -1.450              | 0.273 | 49 | -5.311 | < 0.0001* |
| <b>Neurodevelopmental Disorder</b> |                     |       |    |        |           |
| Intercept                          | 16.463              | 3.396 | 68 | 4.848  | < 0.0001  |
| Time                               | -0.216              | 0.456 | 68 | -0.474 | 0.6368    |
| <b>Anxiety Disorder</b>            |                     |       |    |        |           |
| Intercept                          | 32.377              | 5.625 | 6  | 5.756  | 0.0012    |
| Time                               | -2.076              | 1.114 | 6  | -1.864 | 0.1116    |
| <b>Bipolar Spectrum Disorder</b>   |                     |       |    |        |           |
| Intercept                          | 21.970              | 4.131 | 24 | 5.319  | < 0.0001  |
| Time                               | -0.496              | 0.968 | 24 | -0.513 | 0.6127    |

Note. SE = Standard Error. df = degree of freedom. t = t-value. \* *p*-value < 0.05.

**Table S6.** The result of multilevel analysis of each mental disorder for ‘Mental Health Screening Tool for Anxiety disorders’.

|                                    | Effects<br>Estimate | SE    | df | t      | <i>p</i> |
|------------------------------------|---------------------|-------|----|--------|----------|
| <b>Depressive Disorder</b>         |                     |       |    |        |          |
| Intercept                          | 15.685              | 2.302 | 86 | 6.81   | < 0.0001 |
| Time                               | -1.220              | 0.299 | 86 | -4.08  | 0.0002*  |
| <b>Schizophrenia</b>               |                     |       |    |        |          |
| Intercept                          | 16.147              | 2.496 | 77 | 6.469  | < 0.0001 |
| Time                               | -0.578              | 0.509 | 77 | -1.134 | 0.2603   |
| <b>Neurocognitive Disorder</b>     |                     |       |    |        |          |
| Intercept                          | 8.606               | 2.599 | 49 | 3.311  | 0.0017   |
| Time                               | -0.017              | 0.170 | 49 | -0.100 | 0.9209   |
| <b>Neurodevelopmental Disorder</b> |                     |       |    |        |          |
| Intercept                          | 15.644              | 3.101 | 68 | 5.045  | < 0.0001 |
| Time                               | -0.533              | 0.521 | 68 | -1.022 | 0.3106   |
| <b>Anxiety Disorder</b>            |                     |       |    |        |          |
| Intercept                          | 16.944              | 4.102 | 6  | 4.130  | 0.0061   |
| Time                               | 0.358               | 1.790 | 6  | 0.200  | 0.8481   |
| <b>Bipolar Spectrum Disorder</b>   |                     |       |    |        |          |
| Intercept                          | 22.762              | 3.451 | 24 | 6.595  | < 0.0001 |
| Time                               | -0.411              | 1.029 | 24 | -0.400 | 0.6928   |

Note. SE = Standard Error. df = degree of freedom. t = t-value. \* *p*-value < 0.05.

**Table S7.** The result of multilevel analysis of each mental disorder for 'Engagement in Daily Activity Scale'.

|                                    | Effects<br>Estimate | SE    | df | t      | <i>p</i> |
|------------------------------------|---------------------|-------|----|--------|----------|
| <b>Depressive Disorder</b>         |                     |       |    |        |          |
| Intercept                          | 14.601              | 0.647 | 86 | 22.556 | < 0.0001 |
| Time                               | 0.182               | 0.167 | 86 | 1.089  | 0.2794   |
| <b>Schizophrenia</b>               |                     |       |    |        |          |
| Intercept                          | 16.717              | 0.963 | 77 | 17.358 | < 0.0001 |
| Time                               | 0.252               | 0.148 | 77 | 1.697  | 0.0937   |
| <b>Neurocognitive Disorder</b>     |                     |       |    |        |          |
| Intercept                          | 20.642              | 0.938 | 49 | 22.002 | < 0.0001 |
| Time                               | 0.317               | 0.198 | 49 | 1.602  | 0.1156   |
| <b>Neurodevelopmental Disorder</b> |                     |       |    |        |          |
| Intercept                          | 18.257              | 1.169 | 68 | 15.619 | < 0.0001 |
| Time                               | 0.022               | 0.197 | 68 | 0.112  | 0.9108   |
| <b>Anxiety Disorder</b>            |                     |       |    |        |          |
| Intercept                          | 10.750              | 1.734 | 6  | 6.201  | 0.0008   |
| Time                               | 0.429               | 0.757 | 6  | 0.566  | 0.5916   |
| <b>Bipolar Spectrum Disorder</b>   |                     |       |    |        |          |
| Intercept                          | 15.055              | 0.981 | 24 | 15.3   | 0.0012   |
| Time                               | -0.104              | 0.174 | 24 | -0.6   | 0.5714   |

Note. SE = Standard Error. df = degree of freedom. t = t-value.

**Table S8.** The result of multilevel analysis of each mental disorder for 'Brief version of WHO Quality of Life'.

|                                    | Effects<br>Estimate | SE    | df | t      | <i>p</i> |
|------------------------------------|---------------------|-------|----|--------|----------|
| <b>Depressive Disorder</b>         |                     |       |    |        |          |
| Intercept                          | 70.318              | 4.001 | 10 | 17.574 | < 0.0001 |
| Time                               | 8.273               | 3.894 | 10 | 2.124  | 0.060    |
| <b>Schizophrenia</b>               |                     |       |    |        |          |
| Intercept                          | 72.125              | 9.159 | 3  | 7.875  | 0.0043   |
| Time                               | 5.750               | 6.343 | 3  | 0.907  | 0.4315   |
| <b>Neurocognitive Disorder</b>     |                     |       |    |        |          |
| Intercept                          | 85.143              | 2.528 | 13 | 33.686 | < 0.0001 |
| Time                               | 2.000               | 4.728 | 13 | 0.423  | 0.6792   |
| <b>Neurodevelopmental Disorder</b> |                     |       |    |        |          |
| Intercept                          | 88.498              | 5.408 | 12 | 16.365 | < 0.0001 |
| Time                               | 2.689               | 5.467 | 8  | 0.492  | 0.636    |
| <b>Bipolar Spectrum Disorder</b>   |                     |       |    |        |          |
| Intercept                          | 64.177              | 4.390 | 2  | 14.620 | 0.0046   |
| Time                               | -4.313              | 8.755 | 1  | -0.493 | 0.7086   |

Note. Anxiety disorder cannot be analyzed due to insufficient data (N = 1). SE = Standard Error. df = degree of freedom. t = t-value.



**Table S9.** The result of multilevel analysis of each mental disorder for ‘Mindful Attention Awareness Scale’.

|                                        | Effects<br>Estimate | SE    | df | t      | <i>p</i> |
|----------------------------------------|---------------------|-------|----|--------|----------|
| <b>Depressive<br/>Disorder</b>         |                     |       |    |        |          |
| Intercept                              | 57.000              | 3.208 | 12 | 17.771 | < 0.0001 |
| Time                                   | 2.154               | 5.545 | 12 | 0.389  | 0.7045   |
| <b>Schizophrenia</b>                   |                     |       |    |        |          |
| Intercept                              | 50.083              | 4.320 | 11 | 11.595 | < 0.0001 |
| Time                                   | 2.167               | 3.191 | 11 | 0.679  | 0.5111   |
| <b>Neurocognitive<br/>Disorder</b>     |                     |       |    |        |          |
| Intercept                              | 60.250              | 4.255 | 11 | 14.159 | < 0.0001 |
| Time                                   | 8.333               | 6.117 | 11 | 1.362  | 0.2003   |
| <b>Neurodevelopmental<br/>Disorder</b> |                     |       |    |        |          |
| Intercept                              | 58.110              | 4.047 | 13 | 14.358 | < 0.0001 |
| Time                                   | 6.507               | 3.837 | 10 | 1.696  | 0.1208   |
| <b>Bipolar Spectrum<br/>Disorder</b>   |                     |       |    |        |          |
| Intercept                              | 49.861              | 3.475 | 3  | 14.348 | 0.0007   |
| Time                                   | 1.223               | 6.029 | 2  | 0.203  | 0.8580   |

Note. Anxiety disorder cannot be analyzed due to insufficient data (N = 1). SE = Standard Error. df = degree of freedom. t = t-value.
